# Supplementary material
Source: Springer Nature journal article supplement (https://www.springermedizin.de/resource/supplementary/12872_2014_859_MOESM4_ESM.pdf/9430694)

a

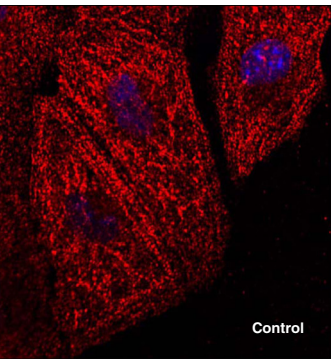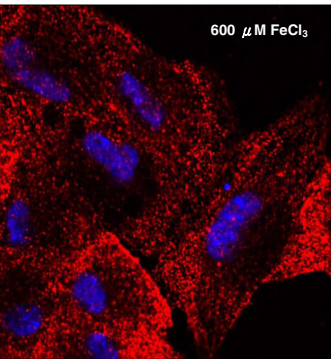

b

Control

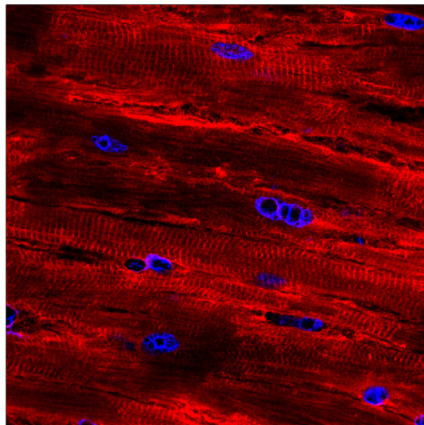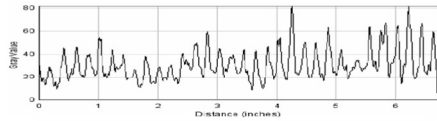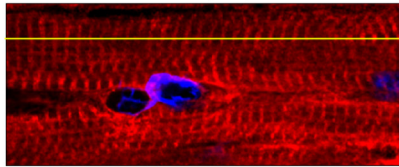

Iron loaded

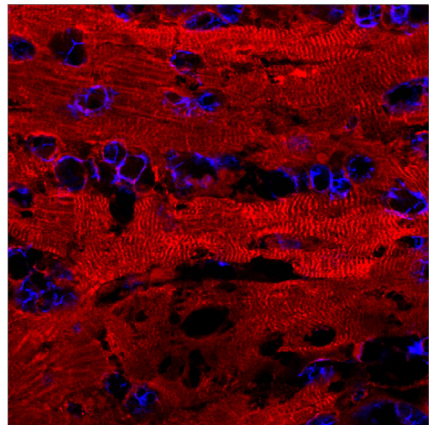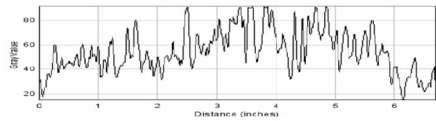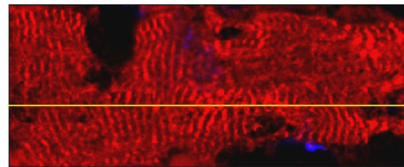

Supplement: MOESM4 [file 9430694]
